# Supplementary material
Source: PubMed Central journal article supplement (PMC3570819)
Supplement: supp_WNL.0b013e3182759766_acute_eeg_findings.pdf [file supp_WNL.0b013e3182759766_acute_eeg_findings.pdf]

## Acute EEG findings in children with febrile status epilepticus: Results of the FEBSTAT study.

الموجودات الحادة الملاحظة على تخطيط الدماغ الكهربائي للأطفال المصابين بحالة الصرعية الناتجة عن الترفع الحروري : نتائج الدراسة FEBSTAT

**الهدف:** الدراسة FEBSTAT (عقائيل تطاول الاختلاج الحروري) تظهر بشكل مستقبلي العلاقة بين اجراء تخطيطات دماغ كهربائية متعددة, الرنين المغناطيسي و المراقبة بالفحص السريري في جمهرة مستقبلية من أطفال متابعين منذ التعرض للحالة الصرعية نتيجة الترفع الحروري.

**طريقة البحث:** تمت دراسة 199 طفلا خلال 72 ساعة من قدومهم بحالة صرعية نتيجة الترفع الحروري. تم أخذ القصة المرضية والفحص السريري بالاضافة الى الرنين المغناطيسي وتخطيط الدماغ الكهربائي لكل طفل خلال 72 ساعة. تم قراءة كل تخطيط كهربائي من قبل فريقين مستقلين ثم تمت مقارنة القراءات.

**النتائج:** من 199 تخطيط دماغ كهربائي, 90 (45.2%) غير طبيعي و كان التباطؤ البؤري أشيع الموجودات (عدد=47) و تخامد الكمونات ثاني أشيع الموجودات (عدد=25), هذه الموجودات أعظمية في المناطق الصدغية في معظم الحالات. الأنشطة صرعية الشكل لوحظت في 13 تخطيط (6.5%). بعد اجراء التعديل, احتمال وجود التباطؤ البؤري ازداد بشكل ملحوظ بتأثير الحالة الصرعية الناتجة عن الترفع الحروري (نسبة الاحتمال =5.08 OR) وشدوذات في الاشارة في الحصين الملاحظة في الزمن T2 (OR=0.18). التباطؤ البؤري ترافق ايضا مع شدوذات في اشارة الحصين على T2 (OR=3.3)

**الاستنتاجات:** التباطؤ البؤري وتخامد الكمونات ملاحظين على تخطيط الدماغ الكهربائي المأخوذ خلال 72 ساعة من الحالة الصرعية الناتجة عن الترفع الحروري في جزء كبير من الأطفال و مترافقين بدلائل الاصابة الحادة للحصين على الرنين المغناطيسي. هذه الموجودات قد تكون علامات حساسة وسريعة الاستحداث للأذية الحادة المترافقة بالحالة الصرعية الناتجة عن الترفع الحروري.

**OBJECTIVE:** The FEBSTAT (Consequences of Prolonged Febrile Seizures) study is prospectively addressing the relationships among serial EEG, MRI, and clinical follow-up in a cohort of children followed from the time of presentation with febrile status epilepticus (FSE).

**METHODS:** We recruited 199 children with FSE within 72 hours of presentation. Children underwent a detailed history, physical examination, MRI, and EEG within 72 hours. All EEGs were read by 2 teams and then conferenced. Associations with abnormal EEG were determined using logistic regression. Interrater reliability was assessed using the  $\kappa$  statistic.

**RESULTS:** Of the 199 EEGs, 90 (45.2%) were abnormal with the most common abnormality being focal slowing ( $n = 47$ ) or attenuation ( $n = 25$ ); these were maximal over the temporal areas in almost all cases. Epileptiform abnormalities were present in 13 EEGs (6.5%). In adjusted analysis, the odds of focal slowing were significantly increased by focal FSE (odds ratio [OR] = 5.08) and hippocampal T2 signal abnormality (OR = 3.50) and significantly decreased with high peak temperature (OR = 0.18). Focal EEG attenuation was also associated with hippocampal T2 signal abnormality (OR = 3.3).

**CONCLUSIONS:** Focal EEG slowing or attenuation are present in EEGs obtained within 72 hours of FSE in a substantial proportion of children and are highly associated with MRI evidence of acute hippocampal injury. These findings may be a sensitive and readily obtainable marker of acute injury associated with FSE.

---

**Translator: Amir Shaban MD, Department of Neurology, Tulane University, New Orleans, LA**

**Translation Reviewer: Owais K. Alsrouji, Senior year medical student, Jordan University of Science and Technology, Irbid, Jordan**
